# Supplementary material for: Antilipogenic and Anti-Inflammatory Activities ofCodonopsis lanceolatain Mice Hepatic Tissues after Chronic Ethanol Feeding
Source: Hindawi journal article supplement (doi:10.1155/2012/141395), 2011-10-12
Supplement: f1 [file 141395.f1.pdf]

**Supplemental Table 1.** List of primer sequences and PCR conditions

| Gene access No. | Gene          | Primers | Sequences (5' -> 3')                               | T <sub>m</sub> (°C) | Cycles | Product size |
|-----------------|---------------|---------|----------------------------------------------------|---------------------|--------|--------------|
| NM_001008533.2  | A1R           | F<br>R  | TGTGACCACCACCCAGAGTA<br>GCAGAGACTGGGACAAGGAG       | 55                  | 30     | 285          |
| NM_009630.2     | A2AR          | F<br>R  | GAAGCAGATGGAGAGCCAAC<br>GAGAGGATGATGGCCAGGTA       | 55                  | 30     | 206          |
| NM_007413.3     | A2BR          | F<br>R  | CCTTTGGCATTGGATTGACT<br>AAAATGCCACGATCATAGC        | 55                  | 30     | 330          |
| NM_009631.3     | A3R           | F<br>R  | TCATACCGGAAGGAATGAGC<br>AGCTTGACCACCCAGATGAC       | 55                  | 30     | 273          |
| NM_011144.3     | PPAR $\alpha$ | F<br>R  | GAACCCAAGTTTGGACTTCGCT<br>CCTATGTTTAGAAGGCCAGGC    | 55                  | 30     | 136          |
| NM_013495.1     | CPT 1         | F<br>R  | CGCACGGAAGGAAAATGG<br>TGTGCCCAATATTCCTGG           | 55                  | 30     | 207          |
| NM_008642.1     | MTP           | F<br>R  | CACACAACCTGGCCTCTCATTAAAT<br>TGCCCCCATCAAGAAACT    | 55                  | 30     | 79           |
| J05029          | LCAD          | F<br>R  | AAGGATTTATTAAGGGCAAGAAGC<br>GGAAGCGGAGGCGGAGTC     | 55                  | 30     | 380          |
| NM_007382.2     | MCAD          | F<br>R  | TGGAGACATTGCCAATCAGC<br>ACCATAGAGCTGAAGACAGG       | 55                  | 30     | 355          |
| NM_011146.2     | PPAR $\gamma$ | F<br>R  | TGGGTGAAACTCTGGGAGAT<br>CCATAGTGGAAGCCTGATGC       | 55                  | 30     | 454          |
| NM_009024.2     | RXR           | F<br>R  | TGCGTCCCAATCCCCAGATA<br>ATCCAGCTCCCCAATACAC        | 55                  | 30     | 157          |
| NM_009883.2     | C/EBP         | F<br>R  | CTGAGCGACGAGTACAAGAT<br>CTGCTTGAACAAGTTCCG         | 55                  | 30     | 191          |
| NM_008509.2     | LPL           | F<br>R  | ACTTGTCATCTCATTCTGG<br>GCACCCAACCTCTCATACATT       | 55                  | 30     | 20           |
| NM_024406.1     | aP2           | F<br>R  | ACATGAAAGTGGGAGTG<br>AAGTACTCTCTGACCGGATG          | 55                  | 30     | 20           |
| NM_007988.3     | FAS           | F<br>R  | TTGCCCGAGTCAGAGAACC<br>CGTCCACAATAGCTTCATAGC       | 55                  | 30     | 171          |
| NM_030682.1     | TLR1          | F<br>R  | TCTCTGAAGGCTTTGTGATAACA<br>GACAGAGCCTGTAAGCATATTCG | 55                  | 35     | 426          |
| NM_011905.2     | TLR2          | F<br>R  | TCTAAAGTCGATCCGCGACAT<br>TACCAGCTCGCTCACTACGT      | 55                  | 35     | 344          |

**Supplemental Table 1. (continued)**

| Gene access No. | Gene  | Primers | Sequences (5' -> 3')                                               | Tm (°C) | Cycles | Product size |
|-----------------|-------|---------|--------------------------------------------------------------------|---------|--------|--------------|
| NM_126166.3     | TLR3  | F<br>R  | TTGTCTTCTGCACGAACCTG<br>CGCAACGCAAGGATTTTATT                       | 55      | 35     | 217          |
| NM_021297       | TLR4  | F<br>R  | ACCTCTGCCTTCACTACAGA<br>AGGGACTTCTCAACCTTCTC                       | 55      | 35     | 223          |
| NM_016928.2     | TLR5  | F<br>R  | ACTGAATTCCTTAAGCGACGTA<br>AGAAGATAAAGCCGTGCGAAA                    | 55      | 35     | 401          |
| NM_011604.2     | TLR6  | F<br>R  | AACAGGATACGGAGCCTTGA<br>CCAGGAAAGTCAGCTTCGTC                       | 55      | 35     | 199          |
| NM_133211.3     | TLR7  | F<br>R  | TTCCGATACGATGAATATGCACG<br>TGAGTTTGTCCAGAAGCCGTAAT                 | 55      | 35     | 199          |
| NM_133212.2     | TLR8  | F<br>R  | GGCACAACCTCCCTTGTGATT<br>CATTTGGGTGCTGTTGTTTG                      | 55      | 35     | 412          |
| NM_031178.1     | TLR9  | F<br>R  | ATGGTTCTCCGTCGAAGGACT<br>GAGGCTTCAGCTCACAGGG                       | 60      | 35     | 118          |
| NM_205823.1     | TLR12 | F<br>R  | ATACCCAAATACGGATGAGC<br>GGCAGCCCAGTGATAAGG                         | 55      | 33     | 421          |
| NM_205820.1     | TLR13 | F<br>R  | CAAAGACGCCTTCACTCC<br>CAAAGACGCCTTCACTCC                           | 55      | 33     | 284          |
| NM_008489.2     | LBP   | F<br>R  | CAAACCTCTGCCAGTCACA<br>GGACATTGGCACCCAAGT                          | 55      | 30     | 786          |
| NM_009841.3     | CD14  | F<br>R  | TGAGTATTGCCCAAGCACACT<br>GTAACCTGAGATCCAGCACGCT                    | 55      | 30     | 389          |
| NM_010851.2     | MyD88 | F<br>R  | AAGAAAGTGAGTCTCCCCTC<br>TCCCATGAAACCTCTAACAC                       | 55      | 30     | 149          |
| NM_054096.1     | MAL   | F<br>R  | GTGGCCGCTGGAGCAAAGAC<br>TTGCCTCTGCCATCCACATA                       | 55      | 35     | 370          |
| NM_174989.3     | TRIF  | F<br>R  | ATG GAT AAC CCA GGG CCT T<br>TTC TGG TCA CTG CAG GGG AT            | 55      | 30     | 528          |
| NM_009424.2     | TRAF6 | F<br>R  | GCA CAA GTG CCC AGT TGA CAA TGA<br>AGT GTC GTG CCA AGT GAT TCC TCT | 55      | 35     | 689          |
| NM_008390.1     | IRF1  | F<br>R  | AGCTGTGTGCAGATGTTAGCC<br>CGTGAAGACATGTTGTATGCC                     | 55      | 30     | 478          |
| NM_016849.3     | IRF3  | F<br>R  | ACATCTCCAACAGCCAGCCTAT<br>AGTCCATGTCCTCCACCAAGTC                   | 55      | 30     | 80           |

**Supplemental Table 1. (continued)**

| Gene access No. | Gene          | Primers | Sequences (5' -> 3')                                                             | Tm (°C) | Cycles | Product size |
|-----------------|---------------|---------|----------------------------------------------------------------------------------|---------|--------|--------------|
| NM_012057.2     | IRF5          | F<br>R  | AATACCCCACCACCTTTTGA<br>TTGAGATCCGGGTTTGAGAT                                     | 55      | 33     | 191          |
| NM_016850.2     | IRF7          | F<br>R  | CAGCGAGTGCTGTTTGGAGAC<br>AAGTTCGTACACCTTATGCGG                                   | 55      | 30     | 350          |
| NM_008689.2     | p50           | F<br>R  | CGCCAAAGTATAAGGATGTC<br>GTAGAGAAAGGTTTCGGTT                                      | 55      | 30     | 104          |
| NM_009045       | p65           | F<br>R  | AGCACAGATACCACCAAGAC<br>TCAGCCTCATAGTAGCCATC                                     | 55      | 30     | 158          |
| NM_013693.2     | TNF $\alpha$  | F<br>R  | TGTCTCAGCCTCTTCTCATT<br>AGATGATCTGAGTGTGAGGG                                     | 55      | 30     | 156          |
| NM_031168.1     | IL-6          | F<br>R  | ATGAAGTTCCTCTCTGCAAGAGACT<br>CACTAGGTTTGCCGAGTAGATCTC                            | 55      | 35     | 638          |
| NM_010502.2     | IFN $\alpha$  | F<br>R  | ATGGCTAG(G/A)CTCTGTGCTTTCCT<br>GGGCTCTCCAGA(T/C)TTCTGCTCTG                       | 55      | 35     | 500          |
| NM_010510.1     | IFN $\beta$   | F<br>R  | CCA CAG CCC TCT CCA TCA ACT ATA<br>AGC<br>AGC TCT TCA ACT GGA GAG CAG TTG<br>AGG | 55      | 35     | 372          |
| NM_008352.2     | IL-12-<br>p40 | F<br>R  | ATC GTT TTG CTG GTG TCT CC<br>CTT TGT GGC AGG TGT ACT GG                         | 55      | 30     | 321          |
| NM_009140.2     | CXCL2         | F<br>R  | GTG CCT CGC TGT CTG AGA GTT<br>AGT TCC CAA CTC ACC CTC TCC                       | 55      | 35     | 277          |
| NM_028320.3     | adipoR1       | F<br>R  | ACGTTGGAGAGTCATCCCGTAT<br>CTCTGTGTGGATGCGGAAGAT                                  | 55      | 30     | 133          |
| NM_197985.3     | adipoR2       | F<br>R  | TCCCAGGAAGATGAAGGGTTTAT<br>TTCCATTCGTTTCGATAGCATGA                               | 55      | 30     | 378          |
| NM_019812.1     | SRIT1         | F<br>R  | AGC TCC TTG GAG ACT GCG AT<br>ATG AAG AGG TGT TGG TGG CA                         | 55      | 30     | 170          |
| NM_008904.1     | PGC1 $\alpha$ | F<br>R  | TAAATCTGCGGGATGATGGA<br>GTTTCGTTTCGACCTGCGTAA                                    | 55      | 30     | 109          |
| NM_011480.2     | SREBP-<br>1c  | F<br>R  | GGAGCCATGGATTGCACATT<br>AGGAAGGCTTCCAGAGAGGA                                     | 55      | 30     | 102          |
| XM001091567     | GAPDH         | F<br>R  | AGA ACA TCA TCC CTG CAT CC<br>TCC ACC ACC CTG TTG CTG TA                         | 55      | 30     | 367          |
